# Supplementary material
Source: PubMed Central journal article supplement (PMC4798737)
Supplement: supp_2015-0177_Supplemental_Information.pdf [file supp_2015-0177_Supplemental_Information.pdf]

**SUPPLEMENTARY DATA**

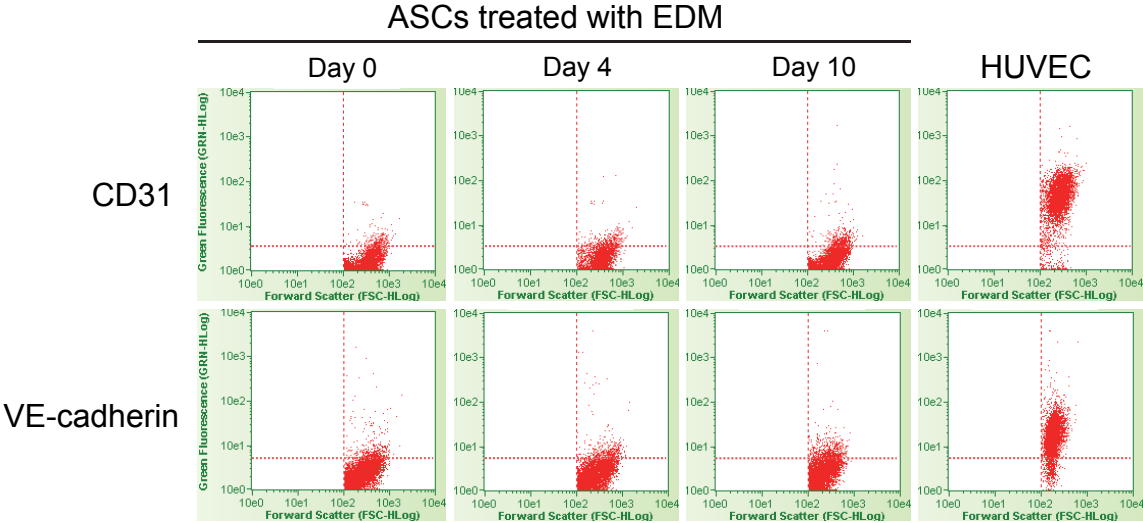

**Figure S1.** Endothelial cell differentiation of ASC. ASCs were incubated in EDM for the indicated days. The proportion of CD31 or VE-cadherin positive cells was determined using immunocytochemistry and flow cytometry analysis. HUVEC was used as a positive control.

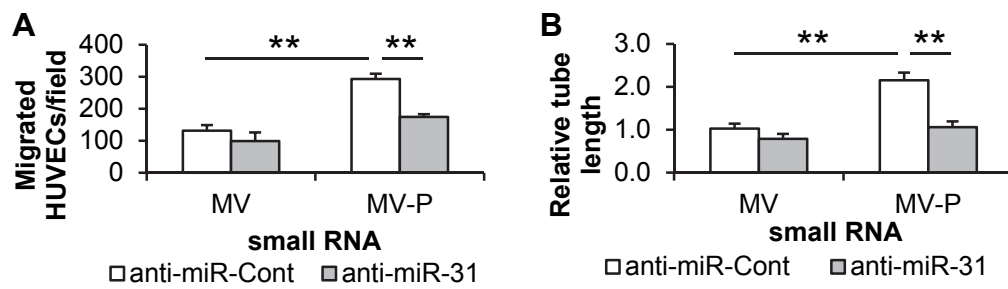

**Figure S2.** MiR-31 contributes to the proangiogenesis as an effective factor in small RNA from MV-P. Co-transfection of 0.5  $\mu\text{g/ml}$  of small RNA extracted from MV or MV-P with 10 nM of anti-miR-31 was performed in the HUVECs. Anti-miR-Cont was used as a control of anti-miR-31. HUVEC migration (**A**) and tube formation (**B**) were examined. (n = 3 – 5,  $**P < 0.01$ ).

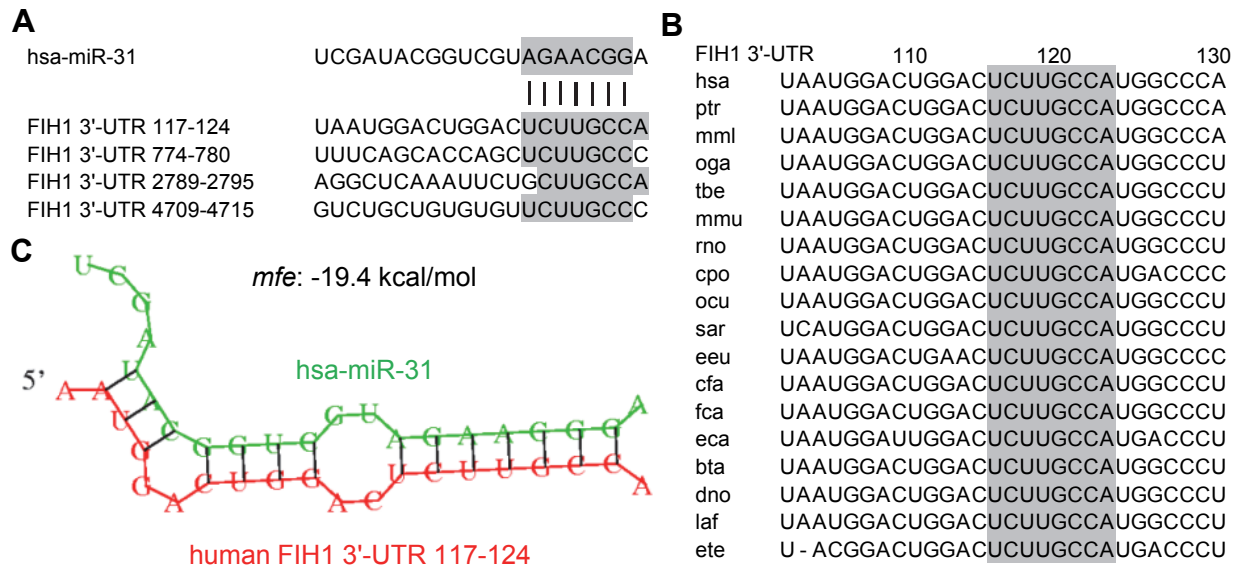

**Figure S3.** MiR-31 and its conserved binding sites at FIH1 3'-UTR. **(A)** There are four predicted miR-31 targets at 3'-UTR of FIH1. **(B)** Only the one with binding site at 117-224 is broadly conserved among vertebrates. **(C)** The minimum free energy (*mfe*) between hsa-miR-31 and human FIH1 3'-UTR at the site of 117-124 was calculated using the PicTar open-source software.

| Rank | microRNA  |
|------|-----------|
| 1    | miR-1262  |
| 2    | miR-549   |
| 3    | miR-1274B |
| 4    | miR-222   |
| 5    | miR-1274A |
| 6    | miR-1267  |
| 7    | miR-99a   |
| 8    | miR-100   |
| 9    | miR-720   |
| 10   | miR-17    |
| 11   | miR-24    |
| 12   | miR-31    |
| 13   | miR-106a  |
| 14   | miR-19b   |
| 15   | miR-221   |

**Table S1.** Top 15 abundant miRNAs in ASC-released MV-P based on the miRNA array analysis. Detailed information can be accessed in the GEO (Gene Expression Omnibus) DataSets with accession number GSE59811 (<http://www.ncbi.nlm.nih.gov/geo/query/acc.cgi?acc=GSE59811>).
